# Supplementary material
Source: PubMed Central journal article supplement (PMC5566278)
Supplement: DC170179SupplementaryData.pdf [file DC170179SupplementaryData.pdf]

## SUPPLEMENTARY DATA

Appendix Figure 1. The study flow chart of the SEARCH for Diabetes in Youth Cohort study

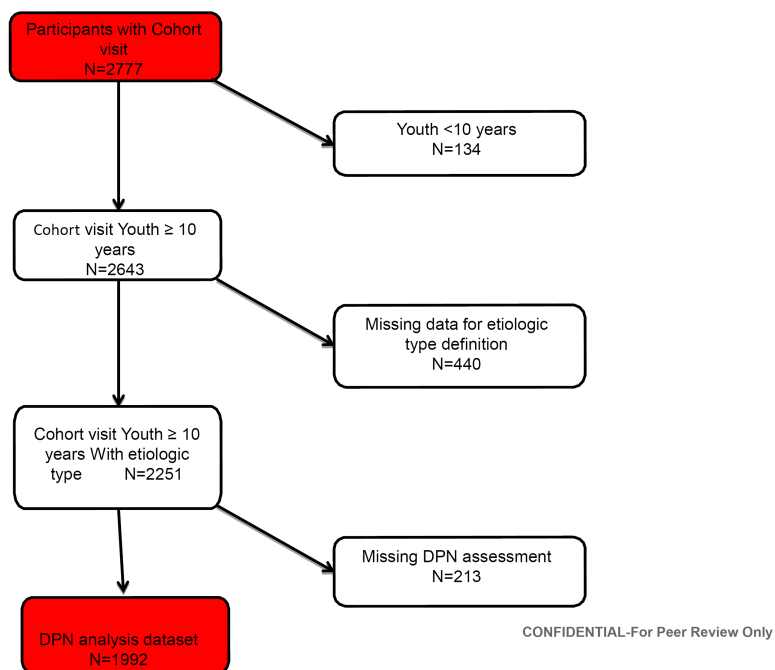

SUPPLEMENTARY DATA

**Appendix Table 1. Characteristics of the participants excluded from and included in the DPN analysis dataset**

| Variable                               | Excluded (N=653) |                    | Included (N=1,992) |                    | P-value |
|----------------------------------------|------------------|--------------------|--------------------|--------------------|---------|
|                                        | N                | Mean (SD) Median   | N1                 | Mean (SD) Median   |         |
| Age at Cohort Visit (years)            | 653              | 18 (5) 17.8        | 1992               | 18.5 (4.3) 18.5    | 0.01    |
| Age at diagnosis                       | 644              | 9.2 (4.8) 9.2      | 1977               | 10.5 (4) 10.7      | <0.001  |
| Diabetes Duration in months            | 653              | 105.8 (23) 106     | 1992               | 94.4 (22.9) 94     | <0.001  |
| Gender (Female)                        | 348              | 54.0%              | 1029               | 52.1%              | 0.38    |
| Provider presumed diabetes type (T2D)  | 94               | 14.6%              | 249                | 12.6%              | 0.20    |
| Hypertension (Yes)                     | 25               | 5.5%               | 56                 | 2.8%               | 0.003   |
| Race                                   |                  |                    |                    |                    | 0.001   |
| Non-Hispanic White                     | 393              | 61.0%              | 1383               | 70.0%              |         |
| Non-Hispanic Black                     | 127              | 19.7%              | 276                | 14.0%              |         |
| Hispanic                               | 96               | 14.9%              | 258                | 13.1%              |         |
| Asian Pacifica Islander                | 13               | 2.0%               | 30                 | 1.5%               |         |
| American Indian                        | 12               | 1.9%               | 24                 | 1.2%               |         |
| Other/Unknown                          | 3                | 0.5%               | 6                  | 0.3%               |         |
| BMI z-score                            | 313              | 0.6 (1) 0.6        | 1251               | 0.7 (1) 0.7        | 0.04    |
| BMI z-score with 20+ year olds imputed | 446              | 0.7 (1.1) 0.7      | 1992               | 0.8 (1) 0.8        | 0.40    |
| SBP, mm Hg                             | 451              | 107.6 (13.3) 107.3 | 1992               | 107.9 (11.9) 107.3 | 0.53    |
| DBP, mm Hg                             | 451              | 68.9 (10.1) 68.7   | 1992               | 69.7 (9.3) 70      | 0.15    |
| HbA1c (%)                              | 439              | 9.3 (2.1) 9        | 1965               | 9.1 (2) 8.9        | 0.36    |
| HDL-cholesterol (mg/dL)                | 427              | 54.5 (15.3) 54     | 1938               | 53.3 (14.2) 52     | 0.16    |
| LDL-cholesterol (mg/dL)                | 415              | 98.4 (30.4) 94     | 1898               | 97.5 (29.7) 93.5   | 0.53    |
| Triglycerides (mg/dL)                  | 415              | 105.5 (108.2) 76   | 1899               | 104.4 (105.1) 79   | 0.84    |

BMI: body mass index, DBP: diastolic blood pressure, DPN: diabetic peripheral neuropathy, HDL: high density lipoprotein, LDL: low density lipoprotein, SBP: systolic blood pressure, T2D: type 2 diabetes;

SUPPLEMENTARY DATA

**Appendix Table 2. T2D vs T1D odds of developing DPN adjusted for covariates.**

| Dependent variable DPN yes/no                     | OR (95% CI)      | P value  |
|---------------------------------------------------|------------------|----------|
| Unadjusted model                                  | 4.19 (2.93,6.00) | < 0.0001 |
| Model 1: adjusted for age and sex                 | 2.74 (1.84,4.08) | < 0.0001 |
| Model 2 adjusted for age, sex and AUC HbA1c       | 2.76 (1.84,4.14) | < 0.0001 |
| Model 3: adjusted for age, sex, AUC HbA1c, height | 2.99 (1.91,4.67) | < 0.001  |
